# Supplementary material for: Chinese Students’ Health Literacy Level and Its Associated Factors: A Meta-Analysis
Source: PubMed Central journal article supplement (PMC7796290; doi:10.3390/ijerph18010204), 2020-12-29
Supplement: ijerph-18-00204-s001.pdf [file ijerph-18-00204-s001.pdf]

# Appendix

## Search strategy

### Database 1: PubMed

| Search | Query                                                                                                                                                                                                                                                                                                                                                                                                                                                                                                                                                                                                                                                                                                                                           | Items found |
|--------|-------------------------------------------------------------------------------------------------------------------------------------------------------------------------------------------------------------------------------------------------------------------------------------------------------------------------------------------------------------------------------------------------------------------------------------------------------------------------------------------------------------------------------------------------------------------------------------------------------------------------------------------------------------------------------------------------------------------------------------------------|-------------|
| #1     | "Health Literacy"[Mesh]                                                                                                                                                                                                                                                                                                                                                                                                                                                                                                                                                                                                                                                                                                                         | 6024        |
| #2     | Literacy, Health[Title/Abstract]                                                                                                                                                                                                                                                                                                                                                                                                                                                                                                                                                                                                                                                                                                                | 177         |
| #3     | ("Health Literacy"[Mesh]) OR (Literacy, Health[Title/Abstract])                                                                                                                                                                                                                                                                                                                                                                                                                                                                                                                                                                                                                                                                                 | 6121        |
| #4     | China[Title/Abstract]                                                                                                                                                                                                                                                                                                                                                                                                                                                                                                                                                                                                                                                                                                                           | 188,705     |
| #5     | chinese[Title/Abstract]                                                                                                                                                                                                                                                                                                                                                                                                                                                                                                                                                                                                                                                                                                                         | 215,063     |
| #6     | (China[Title/Abstract]) OR (chinese[Title/Abstract])                                                                                                                                                                                                                                                                                                                                                                                                                                                                                                                                                                                                                                                                                            | 357,345     |
| #7     | (((((Student[Title/Abstract]) OR (School Enrollment[Title/Abstract])) OR (Enrollment, School[Title/Abstract])) OR (Enrollments, School[Title/Abstract])) OR (School Enrollments[Title/Abstract]))                                                                                                                                                                                                                                                                                                                                                                                                                                                                                                                                               | 119,092     |
| #8     | ((((((pupil[Title/Abstract]) OR (elementary student[Title/Abstract])) OR (middle school student[Title/Abstract])) OR (junior[Title/Abstract])) OR (senior[Title/Abstract])) OR (high school student[Title/Abstract])) OR (undergraduate[Title/Abstract])) OR (academician[Title/Abstract])) OR (university man[Title/Abstract])                                                                                                                                                                                                                                                                                                                                                                                                                 | 97,229      |
| #9     | (((((Student[Title/Abstract]) OR (School Enrollment[Title/Abstract])) OR (Enrollment, School[Title/Abstract])) OR (Enrollments, School[Title/Abstract])) OR (School Enrollments[Title/Abstract])) OR (((((((pupil[Title/Abstract]) OR (elementary student[Title/Abstract])) OR (middle school student[Title/Abstract])) OR (junior[Title/Abstract])) OR (senior[Title/Abstract])) OR (high school student[Title/Abstract])) OR (undergraduate[Title/Abstract])) OR (academician[Title/Abstract])) OR (university man[Title/Abstract]))                                                                                                                                                                                                          | 203,704     |
| #10    | (relative risk[Title/Abstract]) OR (factors[Title/Abstract])                                                                                                                                                                                                                                                                                                                                                                                                                                                                                                                                                                                                                                                                                    | 2,142,135   |
| #11    | ((("Health Literacy"[Mesh]) OR (Literacy, Health[Title/Abstract])) AND ((China[Title/Abstract]) OR (chinese[Title/Abstract]))) AND ((((((Student[Title/Abstract]) OR (School Enrollment[Title/Abstract])) OR (Enrollment, School[Title/Abstract])) OR (Enrollments, School[Title/Abstract])) OR (School Enrollments[Title/Abstract])) OR (((((((pupil[Title/Abstract]) OR (elementary student[Title/Abstract])) OR (middle school student[Title/Abstract])) OR (junior[Title/Abstract])) OR (senior[Title/Abstract])) OR (high school student[Title/Abstract])) OR (undergraduate[Title/Abstract])) OR (academician[Title/Abstract])) OR (university man[Title/Abstract])))) AND ((relative risk[Title/Abstract]) OR (factors[Title/Abstract])) | 10          |

Pub.types: article

### Database 2: EMBASE

| Search | Query                            | Items found |
|--------|----------------------------------|-------------|
| #1     | 'health literacy'/exp            | 11,762      |
| #2     | 'literacy, health':ab,ti         | 207         |
| #3     | #1 OR #2                         | 11,832      |
| #4     | 'china':ab,ti OR 'chinese':ab,ti | 442,784     |

|    |                                                                                                                                                                                                                 |           |
|----|-----------------------------------------------------------------------------------------------------------------------------------------------------------------------------------------------------------------|-----------|
| #5 | 'student':ab,ti OR 'school enrollment':ab,ti OR 'enrollment, school':ab,ti OR 'enrollments, school':ab,ti OR 'school enrollments':ab,ti                                                                         | 162,473   |
| #6 | 'pupil':ab,ti OR 'elementary student':ab,ti OR 'middle school student':ab,ti OR 'junior; senior':ab,ti OR 'high school student':ab,ti OR 'undergraduate':ab,ti OR 'academician':ab,ti OR 'university man':ab,ti | 59,776    |
| #7 | #5 OR #6                                                                                                                                                                                                        | 211,097   |
| #8 | 'relative risk':ab,ti OR 'factors':ab,ti                                                                                                                                                                        | 2,774,852 |
| #9 | #3 AND #4 AND #7 AND #8                                                                                                                                                                                         | 4         |

Pub.types: article

### Database 3: Cochrane Library

| Search | Query                                                                                                                                                                                                           | Items found |
|--------|-----------------------------------------------------------------------------------------------------------------------------------------------------------------------------------------------------------------|-------------|
| #1     | 'health literacy'/exp                                                                                                                                                                                           | 366         |
| #2     | 'literacy, health':ab,ti                                                                                                                                                                                        | 2534        |
| #3     | #1 OR #2                                                                                                                                                                                                        | 2542        |
| #4     | 'china':ab,ti OR 'chinese':ab,ti                                                                                                                                                                                | 13,193      |
| #5     | 'student':ab,ti OR 'school enrollment':ab,ti OR 'enrollment, school':ab,ti OR 'enrollments, school':ab,ti OR 'school enrollments':ab,ti                                                                         | 26,610      |
| #6     | 'pupil':ab,ti OR 'elementary student':ab,ti OR 'middle school student':ab,ti OR 'junior; senior':ab,ti OR 'high school student':ab,ti OR 'undergraduate':ab,ti OR 'academician':ab,ti OR 'university man':ab,ti | 34,998      |
| #7     | #5 OR #6                                                                                                                                                                                                        | 22,662      |
| #8     | 'relative risk':ab,ti OR 'factors':ab,ti                                                                                                                                                                        | 9460        |
| #9     | #3 AND #4 AND #7 AND #8                                                                                                                                                                                         | 28,817      |
| #10    | 'health literacy'/exp                                                                                                                                                                                           | 196,268     |
| #11    | 'literacy, health':ab,ti                                                                                                                                                                                        | 1           |

Pub.types: article

### Database 4: Web of science

| Search | Query                                                                                                                                                | Items found |
|--------|------------------------------------------------------------------------------------------------------------------------------------------------------|-------------|
| #1     | TS=(Health Literacy or Literacy, Health)                                                                                                             | 28,783      |
| #2     | TS=(China or chinese)                                                                                                                                | 2,134,974   |
| #3     | TS=(Student or School Enrollment or Enrollment, School or Enrollments, School or School Enrollments)                                                 | 1,321,454   |
| #4     | TS=(pupil or elementary student or middle school student or junior; senior or high school student or undergraduate or academician or university man) | 1,125,684   |
| #5     | TS=(relative risk or factors)                                                                                                                        | 11,346,389  |
| #6     | #5 AND #4 AND #3 AND #2 AND #1                                                                                                                       | 42          |

Pub.types: article

### Database 5: CNKI

(主题=健康素养 或者 题名=健康素养 或者 v\_subject=中英文扩展(健康素养) 或者 title=中英文扩展(健康素养)) 并且 ((((((摘要=学生 或者 abstract\_en=中英文扩展(学生)) 或者 (摘要=儿童 或者 abstract\_en=中英文扩展(儿童))) 或者 ((摘要=男童 或者 abstract\_en=中英文扩展(男童)) 或者 (摘要=女童 或者 abstract\_en=中英文扩展(女童))) 或者 ((摘要=幼儿 或者 abstract\_en=中英文扩展(幼儿)) 或者 (摘要=青少年 或者 abstract\_en=中英文扩展(青少年))) 或者 ((摘要=男孩 或者 abstract\_en=中英文扩展(男孩)) 或者 (摘要=女孩 或者 abstract\_en=中英文扩展(女孩))) 或者 ((摘要=

小学生 或者 abstract\_en=中英文扩展(小学生) 或者 (摘要=中学生 或者 abstract\_en=中英文扩展(中学生)) ) 或者 ( (摘要=大学生 或者 abstract\_en=中英文扩展(大学生)) 或者 (摘要=中小學生 或者 abstract\_en=中英文扩展(中小學生)) ) ) 或者 ( (摘要=初中生 或者 abstract\_en=中英文扩展(初中生)) 或者 (摘要=高中生 或者 abstract\_en=中英文扩展(高中生)) ) ) 并且 ( ( (摘要=因素 或者 abstract\_en=中英文扩展(因素)) 或者 (摘要=影响因素 或者 abstract\_en=中英文扩展(影响因素)) ) 或者 ( (摘要=危险因素 或者 abstract\_en=中英文扩展(危险因素)) 或者 (摘要=相关因素 或者 abstract\_en=中英文扩展(相关因素)) ) ) ) (模糊匹配)

期刊论文： 462 条结果

#### **Database 6: Wan Fang**

主题:(健康素养)\*主题:(学生+儿童+男童+女童+幼儿+青少年+男孩+女孩)\*主题:(小学生+中学生+大学生+中小學生+初中生+高中生)\*全部:(因素+影响因素+危险因素+相关因素)

期刊论文： 1047 条

#### **Database 7: CQVIP**

((题名或关键词=健康素养 AND ((((((题名或关键词=学生 OR 题名或关键词=儿童) OR 题名或关键词=男童) OR 题名或关键词=女童) OR 题名或关键词=幼儿) OR 题名或关键词=青少年) OR 题名或关键词=男孩) OR 题名或关键词=女孩)) AND (((题名或关键词=小学生 OR 题名或关键词=中学生) OR 题名或关键词=大学生) OR 题名或关键词=中小學生) OR 题名或关键词=初中生) OR 题名或关键词=高中生)) AND (((题名或关键词=因素 OR 题名或关键词=影响因素) OR 题名或关键词=危险因素) OR 题名或关键词=相关因素))

期刊论文： 92 条
